# Supplementary material
Source: PubMed Central journal article supplement (PMC3230800)
Supplement: imm0134-0469-SD1.pdf [file imm0134-0469-SD1.pdf]

## SUPPORTING INFORMATION

### SUPPLEMENTAL FIGURE LEGENDS

**FIG. S1.** dnRAG1 mice bred onto a RAG1-deficient background fail to develop mature lymphocytes. Cells prepared from WT, dnRAG1<sup>+</sup>RAG1<sup>+/-</sup>, dnRAG1<sup>+</sup>RAG1<sup>-/-</sup>, and RAG1<sup>-/-</sup> bone marrow (BM), spleen (SPL), or thymus (THY), and identified by the gating parameters shown above each row, were analyzed for the expression of B220 and CD43 (top row), sIgM and sIgD (middle two rows), or CD4 and CD8 (bottom two rows). B cell developmental subsets specified by the staining pattern are indicated below each column with corresponding gates. The percentage of cells within the identified gates is shown for representative animals.

**FIG. S2.** Summary of data obtained for Fig. 1C and for analysis of T cell populations in the spleen thymus and lymph node. (A) Summary of data obtained for Fig. 1C in bar graph format. (B) Lymphocyte-gated cells prepared from WT or dnRAG1 spleen, thymus, and lymph node (LN) were analyzed for the expression of CD4 and CD8. (C) Summary of data obtained for Fig. S1B in bar graph format. Significance was determined from post-hoc analysis following one-way ANOVA (\*,  $p < 0.05$ ; \*\*,  $p < 0.01$ ; \*\*\*,  $p < 0.005$ ).

**FIG. S3.** Comparison of cell cycle status and apoptosis levels between sorted CD19<sup>+</sup>B220<sup>hi</sup> and CD19<sup>+</sup>B220<sup>lo</sup> B cells purified from WT and dnRAG1 mice. (A) Sorted CD19<sup>+</sup>B220<sup>hi</sup> and CD19<sup>+</sup>B220<sup>lo</sup> B cells purified from WT and dnRAG1 mice were incubated with Vindelov's reagent and propidium iodide (PI) staining was analyzed by flow cytometry. The percentage of cells in the G1, S, and G2 phase of the cell cycle were determined using the ModFit software

(upper panels). Statistical analysis of data obtained from  $n \geq 3$  animals displayed in bar graph format (lower panels). (B) Sorted  $CD19^+B220^{hi}$  and  $CD19^+B220^{lo}$  B cells purified from WT and dnRAG1 mice were incubated with Annexin V (AV) and PI and analyzed by flow cytometry. The percentage of cells in each quadrant was determined using the FloJo software (upper panels). Statistical analysis of data obtained from  $n \geq 3$  animals presented as in (A) (lower panels). Significance was determined from post-hoc analysis following one-way ANOVA (\*,  $p < 0.05$ ; \*\*,  $p < 0.01$ ; \*\*\*,  $p < 0.005$ ).

**FIG. S4.** Flow cytometric analysis comparing surface expression levels of B220 versus CD43 on BM B cells, and AA4.1 versus B220, IgMa versus IgMb and Ig $\kappa$  vs Ig $\lambda$  on splenic B cells from WT, dnRAG1, 56Rki, and DTG mice. (A) Cells prepared from WT, dnRAG1, 56Rki, and DTG bone marrow or spleen and identified by the gating parameters shown above each row were analyzed for the expression of B220, CD43, and AA4.1. B cell developmental subsets specified by the staining pattern are indicated below each column with corresponding gates. The percentage of cells within the identified gates is shown for representative animals. (B) Cells prepared from WT, dnRAG1, 56Rki, and DTG spleen and identified by the gating parameters shown above each row were analyzed for the expression of IgMa, IgMb, Ig $\kappa$  and Ig $\lambda$ . The percentage of cells within the identified gates is shown for representative animals. The absolute number of cells in each population is shown in the lower panel (\*\*\*,  $p < 0.005$ ).

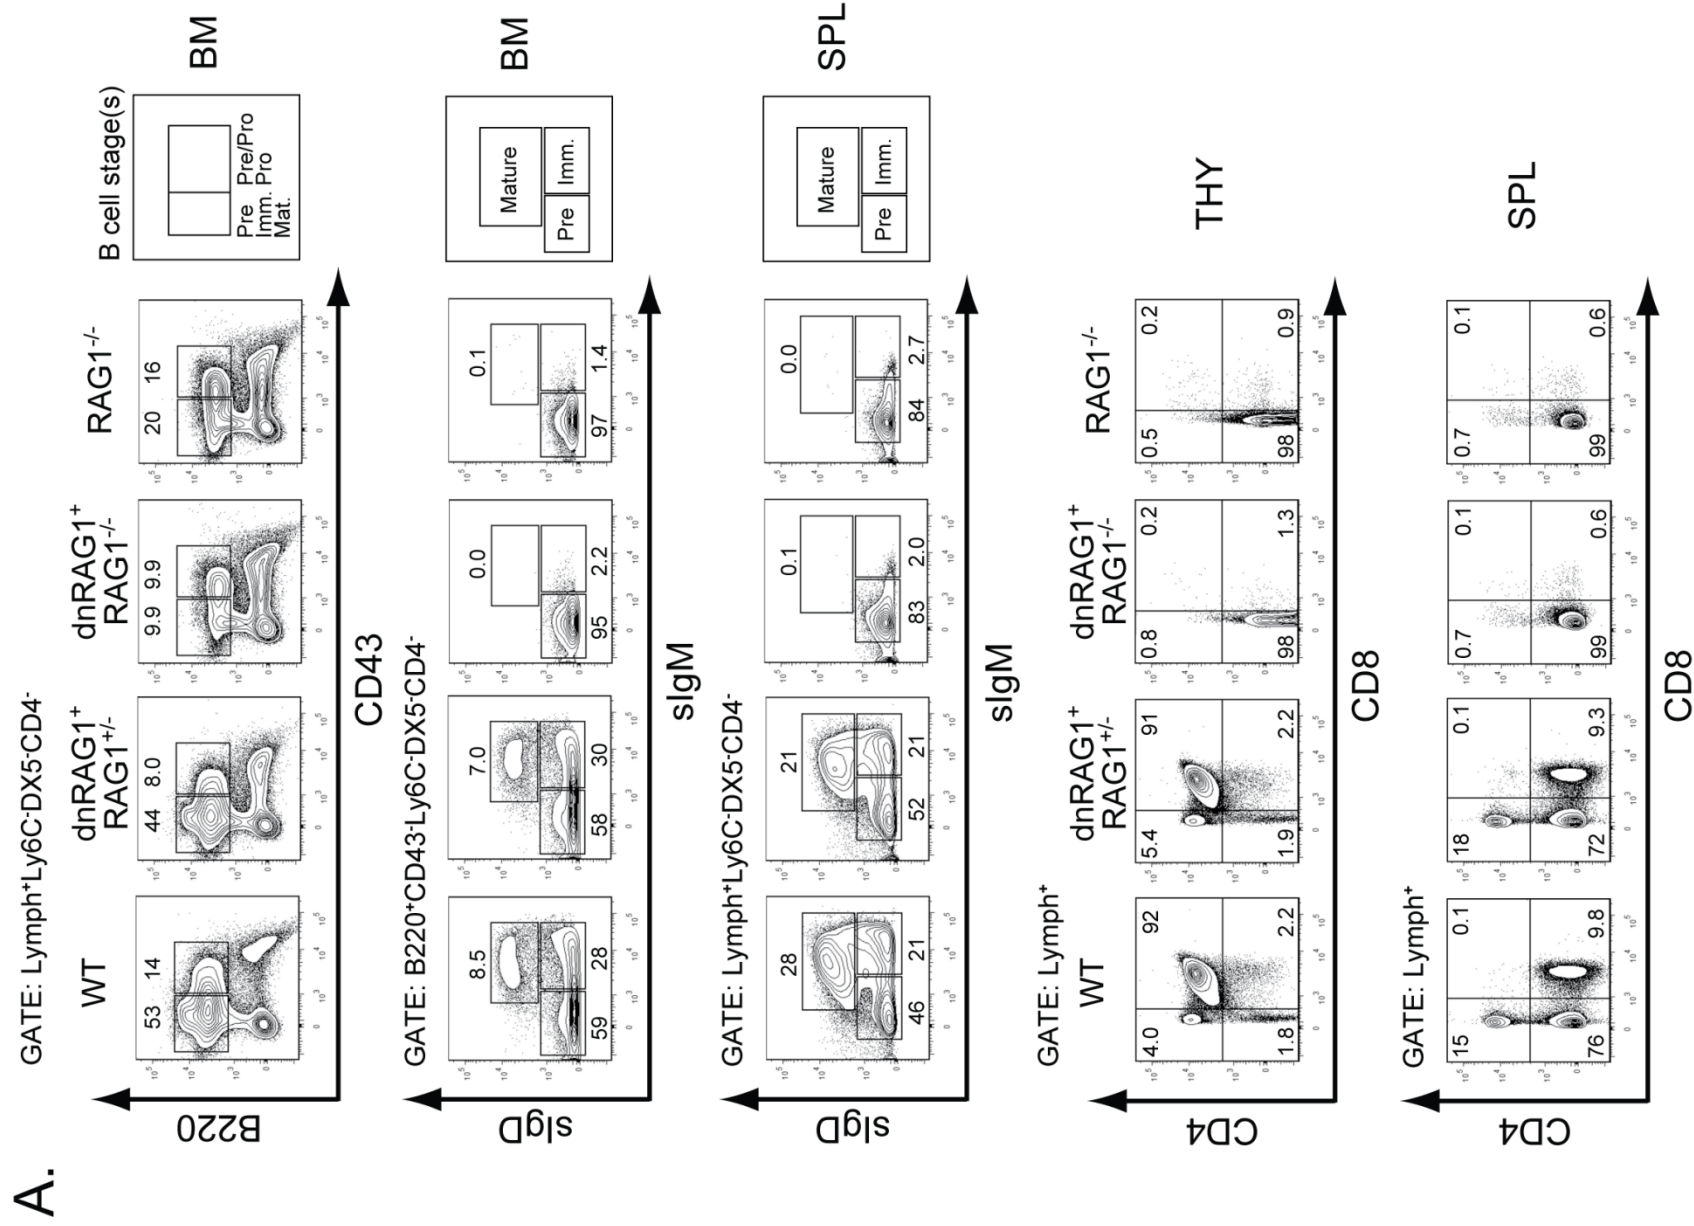

A.

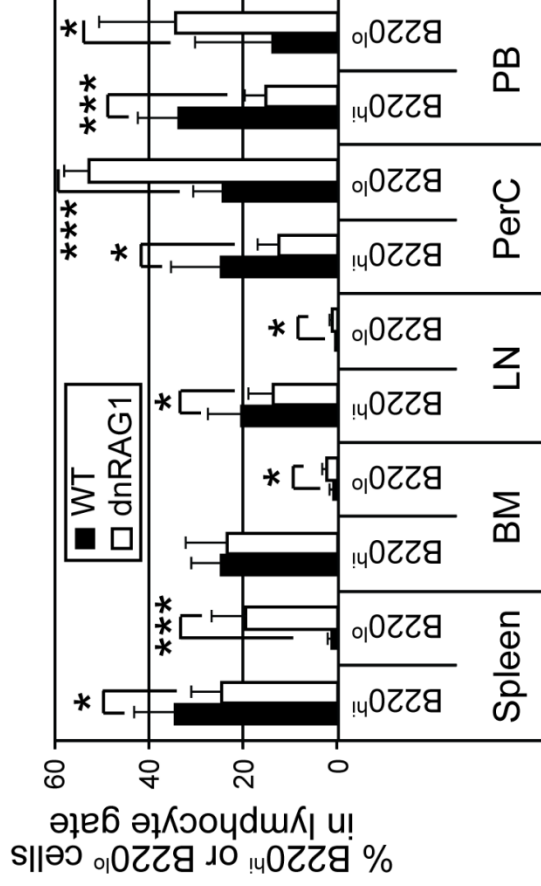

B.

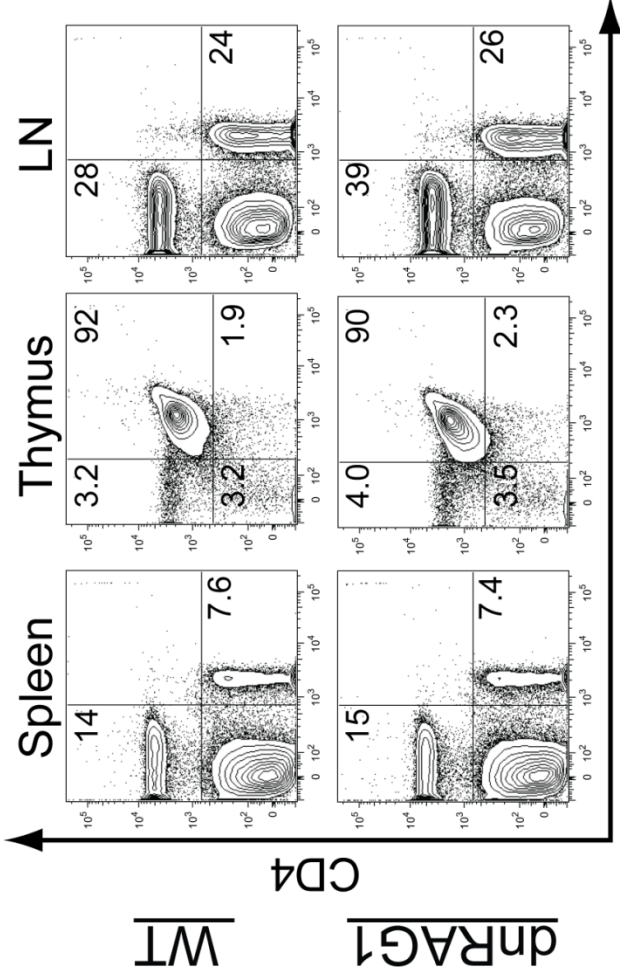

C.

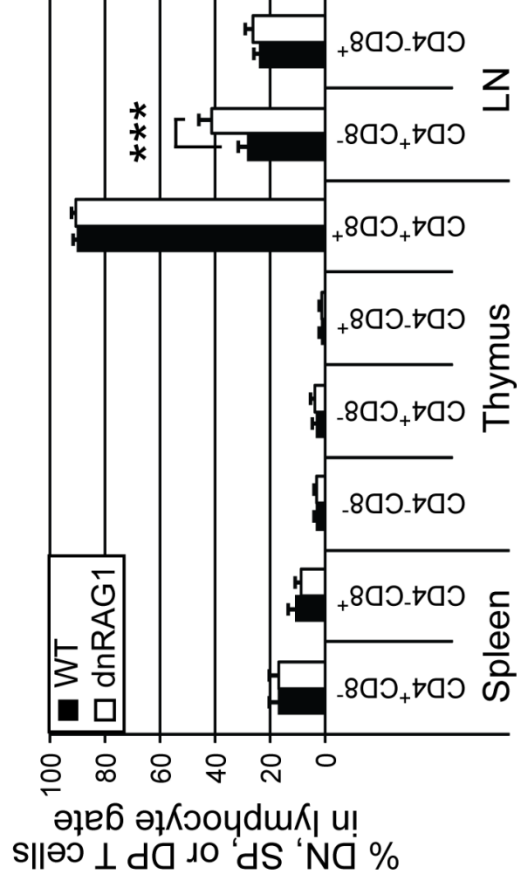

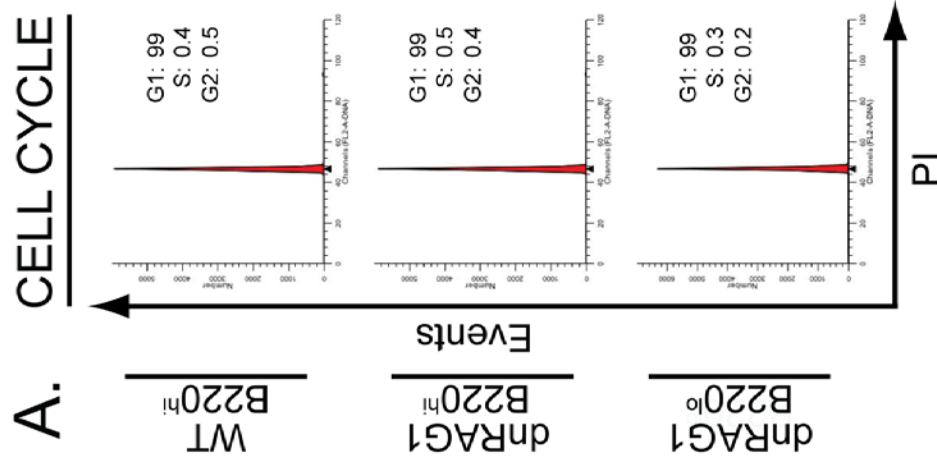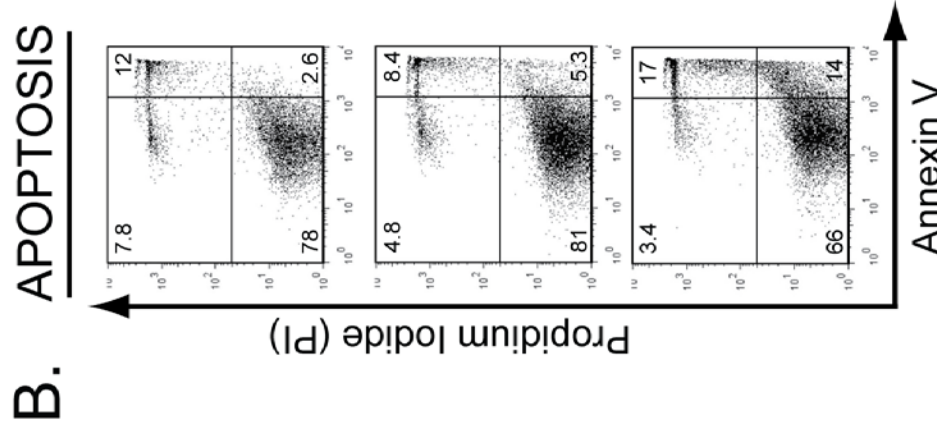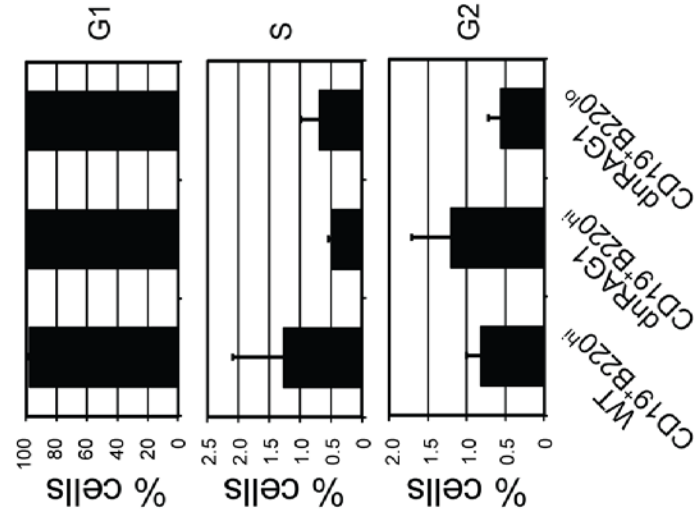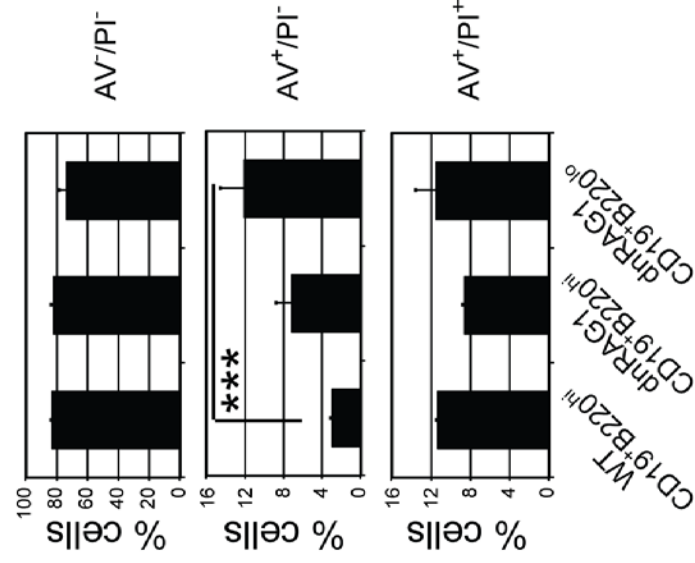

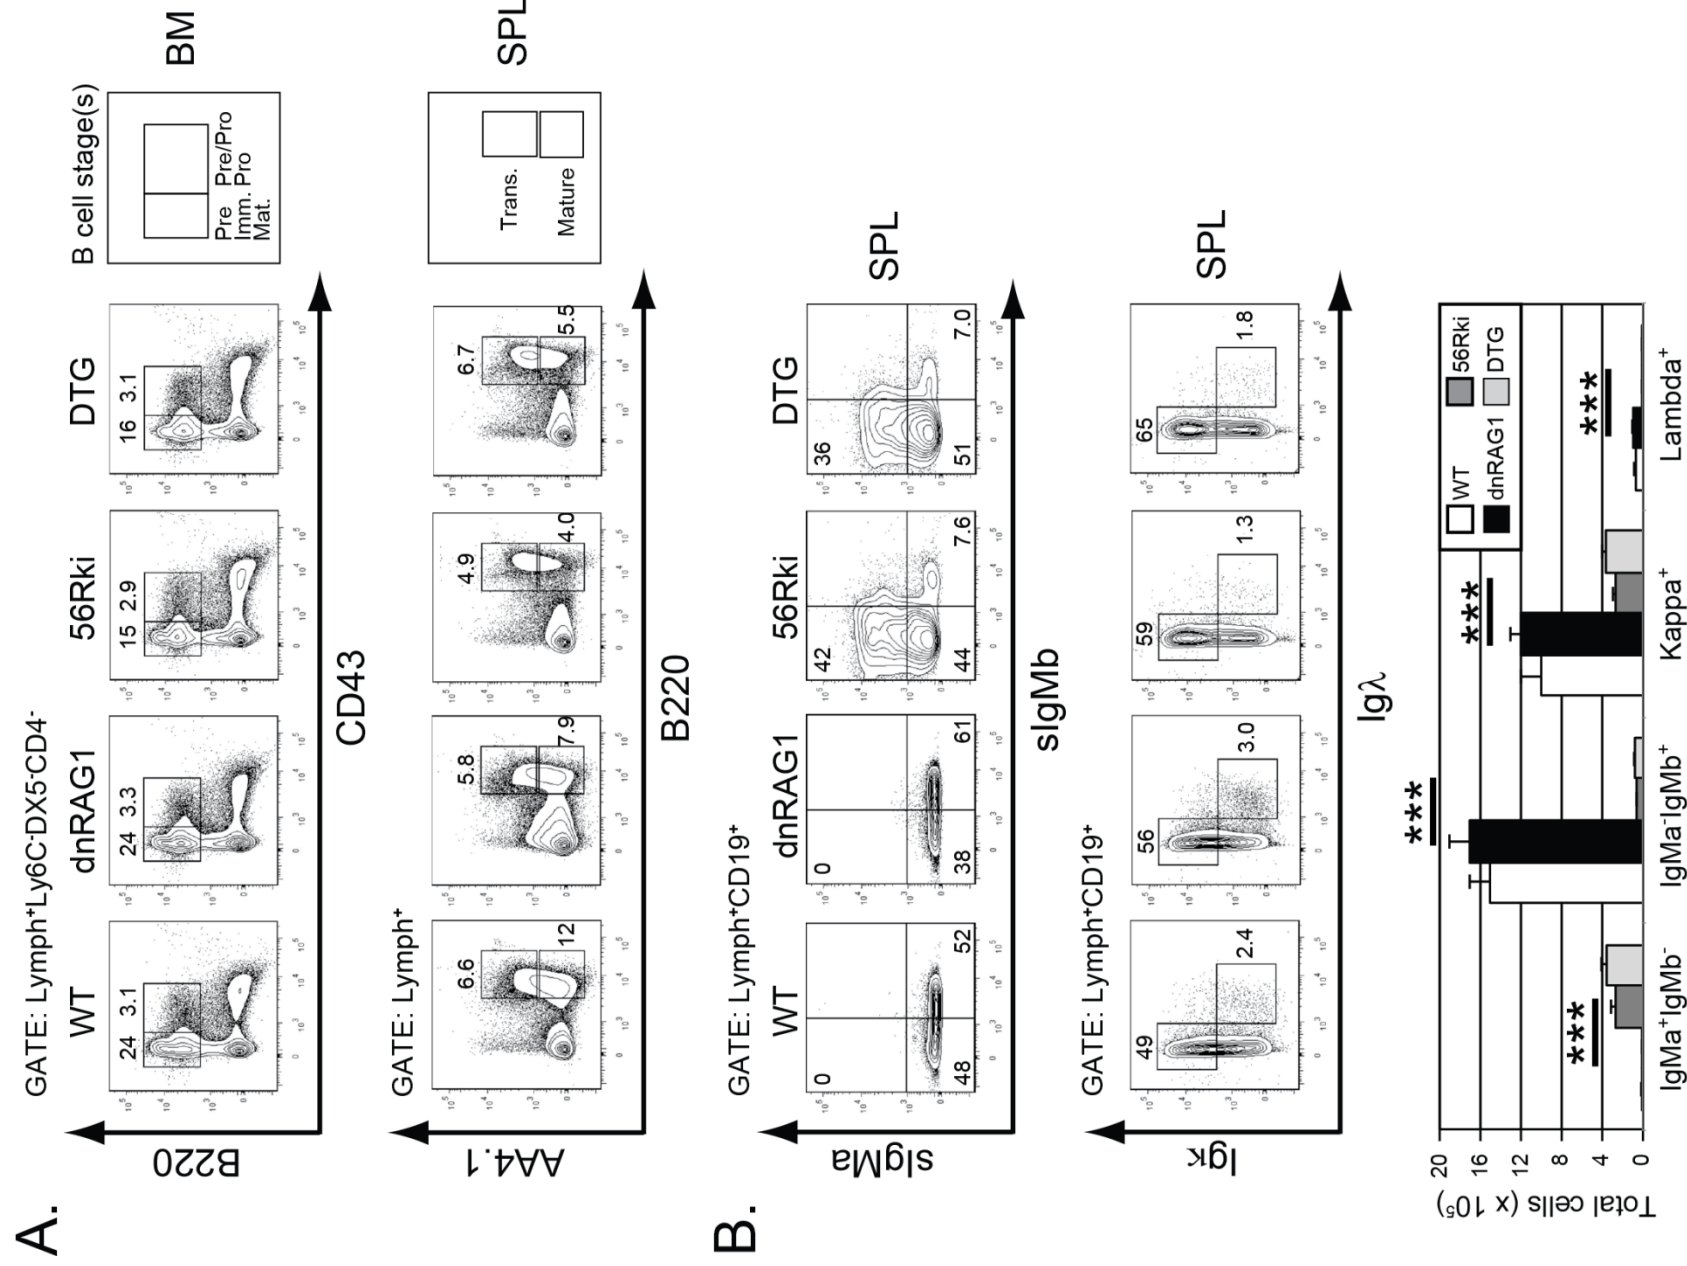

**Table S1.** Primers used for Igk gene sequence analysis.

| <b>Primer name</b> | <b>Sequence (5'-3')</b>                                                                                                                                              |
|--------------------|----------------------------------------------------------------------------------------------------------------------------------------------------------------------|
| MuIgkVL5'-A        | GGGAATTCATGRAGWCACAKWCYCAGGTCTTT                                                                                                                                     |
| MuIgkVL5'-B        | GGGAATTCATGGAGACAGACACACTCCTGCTAT                                                                                                                                    |
| MuIgkVL5'-C        | ACTAGTCGACATGGAGWCAGACACACTSCTGYTATGGGT                                                                                                                              |
| MuIgkVL5'-D        | ACTAGTCGACATGAGGRCCCCTGCTCAGWTTYTTGGIWTCTT<br>ACTAGTCGACATGGGCWTC AAGATGRAGTCACAKWYYCWGG                                                                             |
| MuIgkVL5'-G        | ACTAGTCGACATGAAGTTGCCTGTTAGGCTGTTGGTGCT<br>ACTAGTCGACATGGATTTWCARGTGCAGATTWTCAGCTT<br>ACTAGTCGACATGGTYCTYATVTCCTTGCTGTTCTGG<br>ACTAGTCGACATGGTYCTYATVTTRCTGCTGCTATGG |
| MuIgkVL3'-1        | CCCAAGCTTACTGGATGGTGGGAAGATGGA                                                                                                                                       |

B = C or G or T  
D = A or G or T  
H = A or C or T  
I = inosine  
K = G or T  
M = A or C  
R = A or G  
S = C or G  
V = A or C or G  
W = A or T  
Y = C or T

**Table S2.** Summary of total cell counts of various B cell populations ( $\times 10^5$  unless indicated).

|                                               | WT                              | dnRAG1                          | 56Rki                            | DTG                             | ONE WAY ANOVA <sup>a</sup> | WT vs. dnRAG1 <sup>b</sup> | dnRAG1 vs. DTG <sup>b</sup> | 56Rki vs. DTG <sup>b</sup> |
|-----------------------------------------------|---------------------------------|---------------------------------|----------------------------------|---------------------------------|----------------------------|----------------------------|-----------------------------|----------------------------|
| <i>Bone Marrow</i>                            | <b>(n=9)</b>                    | <b>(n=8)</b>                    | <b>(n=12)</b>                    | <b>(n=10)</b>                   |                            |                            |                             |                            |
| Cellularity ( $\times 10^7$ )                 | 1.79 $\pm$ 0.25                 | 1.74 $\pm$ 0.23                 | 1.87 $\pm$ 0.17                  | 1.69 $\pm$ 0.21                 | n.s.                       | n.s.                       | n.s.                        | n.s.                       |
| Lymphs                                        | <b>(n=4)</b><br>57 $\pm$ 3      | <b>(n=3)</b><br>56 $\pm$ 1      | <b>(n=4)</b><br>61 $\pm$ 2       | <b>(n=4)</b><br>56 $\pm$ 3      | n.s.                       | n.s.                       | n.s.                        | n.s.                       |
| B220 <sup>+</sup> CD43 <sup>+</sup>           | 2.35 $\pm$ 0.34                 | 2.66 $\pm$ 0.73                 | 2.29 $\pm$ 0.27                  | 2.01 $\pm$ 0.21                 | n.s.                       | n.s.                       | n.s.                        | n.s.                       |
| B220 <sup>+</sup> CD43 <sup>-</sup>           | 16.02 $\pm$ 1.68                | 14.02 $\pm$ 0.25                | 10.08 $\pm$ 0.83                 | 9.56 $\pm$ 0.92                 | †††                        | n.s.                       | †                           | n.s.                       |
| Pre- B (IgM <sup>+</sup> IgD <sup>-</sup> )   | 9.07 $\pm$ 1.10                 | 8.55 $\pm$ 0.66                 | 7.47 $\pm$ 0.87                  | 8.06 $\pm$ 0.80                 | n.s.                       | n.s.                       | n.s.                        | n.s.                       |
| Imm. B (IgM <sup>+</sup> IgD <sup>-</sup> )   | 2.25 $\pm$ 0.23                 | 2.34 $\pm$ 0.32                 | 0.32 $\pm$ 0.07                  | 0.40 $\pm$ 0.14                 | †††                        | n.s.                       | †††                         | n.s.                       |
| Mature B (IgM <sup>+</sup> IgD <sup>+</sup> ) | 4.43 $\pm$ 0.69                 | 2.87 $\pm$ 0.14                 | 2.17 $\pm$ 0.14                  | 0.98 $\pm$ 0.05                 | †††                        | †††                        | †††                         | †                          |
| Lymphs                                        | <b>(n=9)</b><br>72.8 $\pm$ 1.4  | <b>(n=8)</b><br>71.3 $\pm$ 2.5  | <b>(n=12)</b><br>68.0 $\pm$ 2.4  | <b>(n=10)</b><br>65.0 $\pm$ 2.9 | n.s.                       | n.s.                       | n.s.                        | n.s.                       |
| IgMa <sup>+</sup> IgMb <sup>-</sup>           | 0.15 $\pm$ 0.05                 | 0.098 $\pm$ 0.021               | 1.22 $\pm$ 0.17                  | 0.99 $\pm$ 0.11                 | †††                        | n.s.                       | †††                         | n.s.                       |
| IgMa <sup>-</sup> IgMb <sup>+</sup>           | 5.6 $\pm$ 0.5                   | 6.34 $\pm$ 0.51                 | 0.34 $\pm$ 0.03                  | 0.50 $\pm$ 0.14                 | †††                        | n.s.                       | †††                         | n.s.                       |
| Kappa <sup>+</sup>                            | <b>(n=7)</b><br>4.33 $\pm$ 0.85 | <b>(n=6)</b><br>4.58 $\pm$ 0.61 | <b>(n=10)</b><br>1.35 $\pm$ 0.17 | <b>(n=8)</b><br>0.97 $\pm$ 0.0  | †††                        | n.s.                       | †††                         | n.s.                       |
| Lambda <sup>+</sup>                           | 0.43 $\pm$ 0.08                 | 0.45 $\pm$ 0.02                 | 0.10 $\pm$ 0.02                  | 0.13 $\pm$ 0.02                 | †††                        | n.s.                       | †††                         | n.s.                       |
| <i>Spleen</i>                                 | <b>(n=7)</b>                    | <b>(n=6)</b>                    | <b>(n=10)</b>                    | <b>(n=8)</b>                    |                            |                            |                             |                            |
| Cellularity ( $\times 10^7$ )                 | 1.5 $\pm$ 0.6                   | 0.99 $\pm$ 0.64                 | 0.59 $\pm$ 0.22                  | 0.64 $\pm$ 0.26                 | n.s.                       | n.s.                       | n.s.                        | n.s.                       |
| Lymphs                                        | 63 $\pm$ 5                      | 47 $\pm$ 5                      | 29 $\pm$ 2                       | 30 $\pm$ 2                      | †††                        | ††                         | †††                         | n.s.                       |
| CD19 <sup>+</sup> B220 <sup>lo</sup>          | 2.6 $\pm$ 1.3                   | 8.0 $\pm$ 1.2                   | 0.61 $\pm$ 0.07                  | 0.80 $\pm$ 0.12                 | †††                        | †††                        | †††                         | n.s.                       |
| CD19 <sup>+</sup> B220 <sup>hi</sup>          | 11 $\pm$ 3                      | 6.2 $\pm$ 1.5                   | 3.3 $\pm$ 0.5                    | 4.2 $\pm$ 0.7                   | †                          | n.s.                       | n.s.                        | n.s.                       |
| B220 <sup>+</sup> AA4.1 <sup>+</sup>          | 6.3 $\pm$ 1.1                   | 3.7 $\pm$ 0.7                   | 1.4 $\pm$ 0.2                    | 2.0 $\pm$ 0.4                   | †††                        | †                          | n.s.                        | n.s.                       |
| T1                                            | 1.8 $\pm$ 0.2                   | 1.6 $\pm$ 0.3                   | 0.34 $\pm$ 0.06                  | 0.77 $\pm$ 0.17                 | †††                        | n.s.                       | †††                         | n.s.                       |
| T2                                            | 1.7 $\pm$ 0.4                   | 0.41 $\pm$ 0.11                 | 0.24 $\pm$ 0.04                  | 0.17 $\pm$ 0.03                 | †††                        | †††                        | n.s.                        | n.s.                       |
| T3                                            | 1.8 $\pm$ 0.6                   | 0.38 $\pm$ 0.14                 | 0.53 $\pm$ 0.11                  | 0.46 $\pm$ 0.11                 | †††                        | †††                        | n.s.                        | n.s.                       |
| B220 <sup>+</sup> AA4.1 <sup>-</sup>          | 10 $\pm$ 1.5                    | 5.4 $\pm$ 1.0                   | 2.8 $\pm$ 0.3                    | 3.2 $\pm$ 0.4                   | †††                        | †††                        | n.s.                        | n.s.                       |
| MZ                                            | 0.62 $\pm$ 0.09                 | 0.73 $\pm$ 0.19                 | 0.54 $\pm$ 0.09                  | 0.78 $\pm$ 0.09                 | †††                        | n.s.                       | ns                          | †††                        |
| FM                                            | 8.1 $\pm$ 1.5                   | 2.8 $\pm$ 0.6                   | 1.8 $\pm$ 0.3                    | 1.2 $\pm$ 0.2                   | †††                        | †††                        | n.s.                        | n.s.                       |
| IgMa <sup>+</sup> IgMb <sup>-</sup>           | 0.081 $\pm$ 0.045               | 0.050 $\pm$ 0.038               | 2.7 $\pm$ 0.4                    | 3.5 $\pm$ 0.6                   | †††                        | n.s.                       | †††                         | n.s.                       |
| IgMa <sup>-</sup> IgMb <sup>+</sup>           | 15 $\pm$ 2                      | 17 $\pm$ 2                      | 0.54 $\pm$ 0.05                  | 0.75 $\pm$ 0.11                 | †††                        | n.s.                       | †††                         | n.s.                       |
| Kappa <sup>+</sup>                            | 10 $\pm$ 2                      | 12 $\pm$ 1                      | 2.7 $\pm$ 0.2                    | 3.6 $\pm$ 0.4                   | †††                        | n.s.                       | †††                         | n.s.                       |
| Lambda <sup>+</sup>                           | 0.71 $\pm$ 0.14                 | 0.96 $\pm$ 0.10                 | 0.033 $\pm$ 0.004                | 0.067 $\pm$ 0.011               | †††                        | n.s.                       | †††                         | n.s.                       |
| <i>Peritoneal Cavity</i>                      | <b>(n=7)</b>                    | <b>(n=6)</b>                    | <b>(n=10)</b>                    | <b>(n=8)</b>                    |                            |                            |                             |                            |
| Cellularity ( $\times 10^7$ )                 | 0.12 $\pm$ 0.04                 | 0.16 $\pm$ 0.03                 | 0.054 $\pm$ 0.017                | 0.10 $\pm$ 0.03                 | n.s.                       | n.s.                       | †                           | n.s.                       |
| Lymphs                                        | 2.8 $\pm$ 0.5                   | 7.4 $\pm$ 1.4                   | 0.90 $\pm$ 0.15                  | 3.0 $\pm$ 0.4                   | †††                        | †††                        | †††                         | †                          |
| CD19 <sup>+</sup> B220 <sup>lo</sup>          | 0.95 $\pm$ 0.31                 | 4.2 $\pm$ 0.6                   | 0.15 $\pm$ 0.03                  | 0.65 $\pm$ 0.10                 | †††                        | †††                        | †††                         | n.s.                       |
| CD19 <sup>+</sup> B220 <sup>hi</sup>          | 0.32 $\pm$ 0.09                 | 0.47 $\pm$ 0.07                 | 0.46 $\pm$ 0.09                  | 0.31 $\pm$ 0.04                 | †††                        | n.s.                       | n.s.                        | †††                        |

<sup>a</sup> variance between groups by one-way ANOVA: n.s., not significant; †,  $p < 0.05$ ; ††,  $p < 0.01$ ; †††,  $p < 0.005$ .<sup>b</sup> post-hoc analysis by unpaired  $t$  test: n.s., not significant; †,  $p < 0.05$ ; ††,  $p < 0.01$ ; †††,  $p < 0.005$ .



**Table S3.** Igc gene sequence analysis.

| Cell Population | Primer Family             | Number                      | Sequence Name               | V region                 | J segment | Mutations         | AA substitutions    | Transition       | Transversion | Insertions   | Total del  | V del     | J del   |         |
|-----------------|---------------------------|-----------------------------|-----------------------------|--------------------------|-----------|-------------------|---------------------|------------------|--------------|--------------|------------|-----------|---------|---------|
| WT B220hi       | Kappa A                   | 1                           | Tg-KA1-M13For_B09_2.ab1     | IgVk 19-23               | Jk5       | 5                 | 2                   | 4                | 1            |              | 3          | 2         | 1       |         |
|                 |                           | 6                           | Tg-6KA-M13For_F02_2.ab1     | Vk 19-23                 | Jk2       | 1                 | 0                   | 1                |              |              | 7          | 4         | 3       |         |
|                 |                           | 7                           | Tg-7KA-M13For_G02_3.ab1     | Vk 19-15, partial        | Jk5       | 1                 | 1                   | 1                |              |              |            | 3         | 3       | precise |
|                 |                           | 9                           | Tg-KA8.1-M13For_C07_3.ab1   | Vk 19-17, partial        | Jk5       | 0                 |                     |                  |              |              |            | 3         | 3       | precise |
|                 |                           | 10                          | Tg-KA9-M13For_D07_4.ab1     | Vk 19-17, partial        | Jk2       | 1                 | 1                   | 1                |              |              |            | 4         | 3       | 1       |
|                 |                           | 11                          | Tg-KA10-M13For_E07_1.ab1    | Vk 19-15, partial        | Jk5       | 1                 | 0                   | 1                |              |              |            | 3         | 3       | precise |
|                 | 12                        | Tg-KA11-M13For_F07_2.ab1    | Vk 19-23                    | Jk5                      | 0         |                   |                     |                  |              |              | 3          | 3         | precise |         |
|                 | Kappa B                   | 1                           | Tg-1-KB-M13Rev_E03_1.ab1    | Vk 21C                   | Jk1       | 0                 |                     |                  |              |              |            | 3         | 1       | 2       |
|                 |                           | 2                           | Tg-2-KB-M13For_B02_2.ab1    | Vk 21A                   | Jk2       | 0                 |                     |                  |              |              |            | 4         | 3       | 1       |
|                 |                           | 3                           | Tg-3-KB-M13For_C02_3.ab1    | Vk 21 Subgroup           | Jk2       | 2                 | 0                   | 2                |              |              |            | 4         | 3       | 1       |
|                 |                           | 4                           | Tg-4-KB-M13For_D02_4.ab1    | Vk 21A                   | Jk2       | 1                 | insert = frameshift |                  |              |              | 1          | 4         | 3       | 1       |
|                 | 6                         | Tg-11KB-M13For_E11_1.ab1    | Vk 21C                      | Jk1                      | 2         |                   | 1                   | 2                |              |              | 3          | precise   | 3       |         |
|                 | 5                         | Tg-KC6-M13For_A09_1.ab1     | Vk 21C                      | Jk1                      | 0         |                   |                     |                  |              |              | 3          | 1         | 2       |         |
|                 | Cell Population           | Primer Family               | Number                      | Sequence Name            | V region  | J segment         | Mutations           | AA substitutions | Transition   | Transversion | Insertions | Total del | V del   | J del   |
|                 | dnRAG1 B220hi             | Kappa A                     | 3                           | Tg+HKA3-M13For_H09_4.ab1 | Vk 19-23  | Jk5               | 0                   |                  |              |              |            | 3         | 2       | 1       |
| 4               |                           |                             | Tg+HKA4-M13For_A10_1.ab1    | Vk 19-32                 | Jk1       | 0                 |                     |                  |              |              | 3          | 1         | 2       |         |
| 5               |                           |                             | Tg+H5KA-M13For_A03_1.ab1    | Vk 19-23                 | Jk5       | 1                 | 1                   | 1                |              |              |            | 3         | 3       | precise |
| 6               |                           |                             | Tg+H6KA-M13For_B03_2.ab1    | Vk 19-15                 | Jk4       | 0                 |                     |                  |              |              |            | 3         | 3       | precise |
| 7               |                           |                             | Tg+H7KA-M13For_C03_3.ab1    | Vk 19-17, partial        | Jk1       | 1                 | 1                   | 1                |              |              | 1          | 3         | 3       | precise |
| 8               |                           |                             | Tg+H8KA-M13For_D03_4.ab1    | Vk 19-23                 | Jk5       | 0                 |                     |                  |              |              |            | 3         | 2       | 1       |
| 10              |                           |                             | Tg+HKA10-M13For_A08_1.ab1   | Vk 19-15, partial        | Jk5       | 0                 |                     |                  |              |              |            | 3         | 2       | 1       |
| 11              |                           |                             | Tg+HKA11-M13For_B08_2.ab1   | Vk 19-23                 | Jk2       | 0                 |                     |                  |              |              |            | 4         | 3       | 1       |
| 12              |                           |                             | Tg+HKA12-M13For_C08_3.ab1   | Vk 19-23                 | Jk5       | 0                 |                     |                  |              |              |            | 3         | 2       | 1       |
| 1               |                           |                             | Tg+H1-KB-M13For_E02_1.ab1   | Vk 21B Subgroup          | Jk2       | 0                 |                     |                  |              |              |            | 4         | precise | 4       |
| 2               |                           |                             | Tg+H1-2-KB-M13For_F02_2.ab1 | Vk 21 Subgroup           | Jk2       | 1                 | 0                   | 1                |              |              |            | 4         | 4       | precise |
| 3               |                           |                             | Tg+H1-3-KB-M13For_G02_3.ab1 | Vk 21C                   | Jk2       | 0                 |                     |                  |              |              |            | 4         | 3       | 1       |
| 4               |                           | Tg+H1-4-KB-M13For_H02_4.ab1 | Vk 21B Subgroup             | Jk2                      | 1         | 0                 | 1                   |                  |              |              | 4          | precise   | 4       |         |
| 6               |                           | Tg+H7KB-M13For_G07_3.ab1    | Vk 21B Subgroup             | Jk1                      | 0         |                   |                     |                  |              |              | 3          | 1         | 2       |         |
| 7               |                           | Tg+H10KB-M13For_H07_4.ab1   | Vk 21B Subgroup             | Jk5                      | 1         | 1                 | 1                   |                  |              |              | 3          | 3         | precise |         |
| 9               |                           | Tg+H12KB-M13For_B02_2.ab1   | Vk 21C                      | Jk2                      | 0         |                   |                     |                  |              |              | 4          | 3         | 1       |         |
| 10              |                           | Tg+H13KB-M13For_C02_3.ab1   | Vk 21 Subgroup              | Jk1                      | 2         | 1                 | 2                   |                  |              |              | 3          | precise   | 3       |         |
| 1               |                           | Tg+HKC1-M13For_G08_3.ab1    | Vk 8-21                     | Jk1                      | 1         | 1                 | 1                   |                  |              |              | perfect    | precise   | precise |         |
| 3               |                           | Tg+HKC3-M13For_A09_1.ab1    | Vk 21 Subgroup              | Jk2                      | 1         | 0                 | 1                   |                  |              |              | 4          | 3         | 1       |         |
| 4               |                           | Tg+HKC5-M13For_A04_1.ab1    | Vk 21C                      | Jk2                      | 1         | 1                 | 1                   |                  |              |              | 4          | 3         | 1       |         |
| 5               |                           | Tg+HKC6-M13For_B04_2.ab1    | Vk 21G                      | Jk2                      | 2         | 2                 | 2                   |                  |              | 1            | 1          | 4         | 3       | 1       |
| 6               |                           | Tg+HKC7-M13For_C04_3.ab1    | Vk 8-27                     | Jk2                      | 0         |                   |                     |                  |              |              | 3          | 2         | 1       |         |
| 7               |                           | Tg+HKC8-M13For_D04_4.ab1    | Vk 21 Subgroup              | Jk1                      | 4         | 3                 | 4                   |                  |              |              | 3          | precise   | 3       |         |
| 8               |                           | Tg+HKC9-M13For_E04_1.ab1    | Vk 8-30                     | Jk2                      | 0         |                   |                     |                  |              |              | 4          | 3         | 1       |         |
| 9               |                           | Tg+HKC10-M13For_F04_2.ab1   | Vk 21 Subgroup              | Jk2                      | 1         | 0                 | 1                   |                  |              |              | 4          | 3         | 1       |         |
| 11              |                           | Tg+HKC12-M13For_H04_4.ab1   | Vk 21A                      | Jk1                      | 0         |                   |                     |                  |              |              | 3          | precise   | 3       |         |
| 1               |                           | Tg+HKD1-M13For_E03_1.ab1    | Vk ba9                      | Jk5                      | 0         |                   |                     |                  |              |              | 3          | 3         | precise |         |
| 2               |                           | Tg+HKD2-M13For_F03_2.ab1    | Vk ba9                      | Jk2                      | 2         | 2                 | 2                   |                  |              | 1            | 1          | 4         | 3       | 1       |
| *3              |                           | Tg+HKD3-M13For_G03_3.ab1    | Vk psi-br9 (9-128)          | Jk5                      | 0         |                   |                     |                  |              |              |            | 3         | precise |         |
| 4               |                           | Tg+HKD4-M13For_H03_4.ab1    | Vk ba9                      | Jk1                      | 1         | 1                 | 1                   |                  |              |              | 3          | 3         | precise |         |
| 5               |                           | Tg+HKD5-M13For_E06_1.ab1    | Vk 8-28                     | Jk5                      | 2         | insert=frameshift |                     |                  |              | 1            | 1          | 3         | 3       | precise |
| 8               |                           | Tg+HKD9-M13For_G01_3.ab1    | Vk ba9                      | Jk1                      | 2         | 2                 | 2                   |                  |              | 1            | 1          | 3         | 1       | 2       |
| 9               |                           | Tg+HKD10-M13For_H01_4.ab1   | Vk 8-28                     | Jk5                      | 0         |                   |                     |                  |              |              | 3          | 3         | precise |         |
| 1               |                           | Tg+HKG1-M13For_F04_2.ab1    | Vk cr1 gene                 | Jk2                      | 0         |                   |                     |                  |              |              | 4          | 3         | 1       |         |
| 3               |                           | Tg+HKG5-M13For_A03_1.ab1    | Vk cr1 gene                 | Jk2                      | 1         | 1                 | 1                   |                  |              |              | 4          | 3         | 1       |         |
| 5               |                           | Tg+HKG7-M13For_C03_3.ab1    | Vk 8-19, partial            | Jk5                      | 0         |                   |                     |                  |              |              | 3          | 3         | precise |         |
| 6               | Tg+HKG9-M13For_D03_4.ab1  | Vk cr1 gene                 | Jk5                         | 0                        |           |                   |                     |                  |              | 3            | 3          | precise   |         |         |
| Cell Population | Primer Family             | Number                      | Sequence Name               | V region                 | J segment | Mutations         | AA substitutions    | Transition       | Transversion | Insertions   | Total del  | V del     | J del   |         |
| dnRAG1 B220lo   | Kappa A                   | 2                           | Tg+LoKA2-M13For_C10_3.ab1   | Vk 19-32                 | Jk1       | 0                 |                     |                  |              |              | 3          | 1         | 2       |         |
|                 |                           | 3                           | Tg+LoKA3-M13For_D10_4.ab1   | Vk 19-32                 | Jk1       | 0                 |                     |                  |              |              | 3          | 1         | 2       |         |
|                 |                           | 4                           | Tg+LoKA-M13For_E03_1.ab1    | Vk 19-32                 | Jk1       | 1                 | 1                   | 1                |              |              |            | 3         | 1       | 2       |
|                 |                           | 5                           | Tg+LoKA-M13For_F03_2.ab1    | Vk 19-32                 | Jk1       | 0                 |                     |                  |              |              |            | 3         | 1       | 2       |
|                 |                           | 6                           | Tg+LoKA-M13For_G03_3.ab1    | Vk 19-32                 | Jk1       | 0                 |                     |                  |              |              |            | 3         | 1       | 2       |
|                 |                           | 7                           | Tg+LoKA8-M13For_D08_4.ab1   | Vk 19-32                 | Jk1       | 1                 | 1                   | 1                |              |              |            | 6         | 6       | precise |
|                 |                           | 8                           | Tg+LoKA9-M13For_E08_1.ab1   | Vk 19-32                 | Jk1       | 0                 |                     |                  |              |              |            | 3         | 1       | 2       |
|                 |                           | 9                           | Tg+LoKA10-M13For_F08_2.ab1  | Vk 19-17                 | Jk5       | 0                 |                     |                  |              |              |            | 3         | 3       | precise |
|                 |                           | 10                          | Tg+LoKA11-M13For_G08_3.ab1  | Vk 19-32                 | Jk1       | 0                 |                     | stop             |              |              |            | 3         | 1       | 2       |
|                 |                           | 5                           | Tg+LoKB-M13For_A08_1.ab1    | Vk 21A                   | Jk2       | 0                 |                     |                  |              |              |            | 4         | 3       | 1       |
|                 | 7                         | Tg+LoL2KB-M13For_D02_4.ab1  | Vk 21C                      | Jk1                      | 0         |                   |                     |                  |              |              | 3          | 1         | 2       |         |
|                 | 2                         | Tg+LoKC2-M13For_D08_4.ab1   | Vk 21C                      | Jk1                      | 0         |                   |                     |                  |              |              | 3          | 1         | 2       |         |
|                 | 6                         | Tg+LoKC6-M13For_B05_2.ab1   | Vk 21A                      | Jk2                      | 0         |                   |                     |                  |              |              | 4          | 3         | 1       |         |
|                 | 7                         | Tg+LoKC7-M13For_C05_3.ab1   | Vk 19-32                    | Jk1                      | 0         |                   |                     |                  |              |              | 3          | 1         | 2       |         |
| 7               | Tg+LoKD8-M13For_D02_4.ab1 | Vk ba9                      | Jk2                         | 0                        |           |                   |                     |                  |              | 4            | 3          | 1         |         |         |
